# Supplementary material
Source: PubMed Central journal article supplement (PMC6885123)

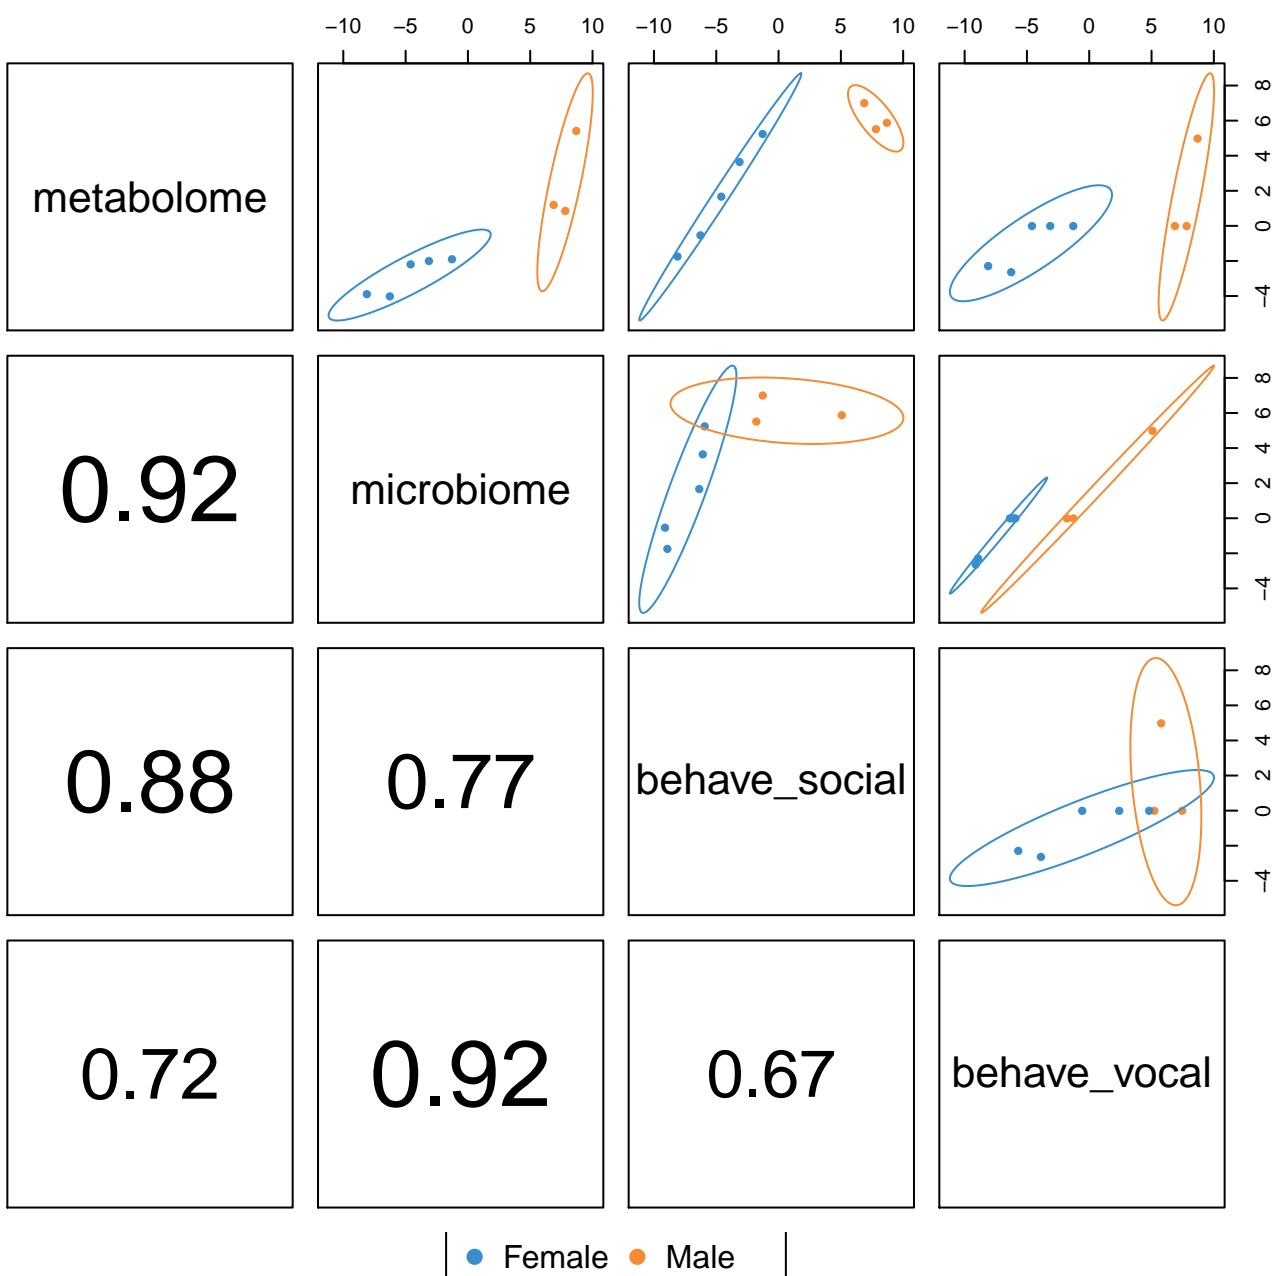

Supplement: NIHMS1532624-supplement-09.pdf [file NIHMS1532624-supplement-09.pdf]
